# Supplementary material
Source: PubMed Central journal article supplement (PMC5462095)
Supplement: NIHMS71519-supplement-Supplement_Figure_1.pdf [file NIHMS71519-supplement-Supplement_Figure_1.pdf]

## SUPPLEMENT

### Low-dose systemic scopolamine disrupts context conditioning in rats

Laura Luyten, Shauni Nuyts, Tom Beckers

*Journal of Psychopharmacology*

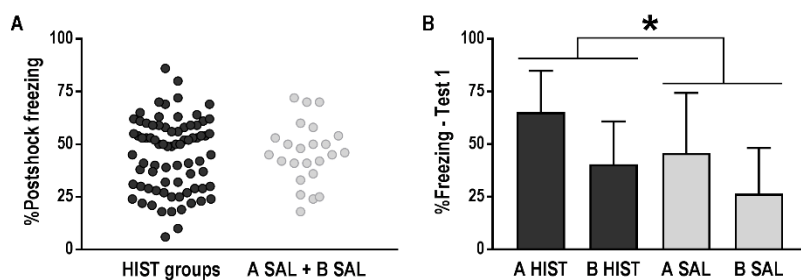

**Suppl. Fig. 1: The effects of 0.1 mg/kg post-training scopolamine – a comparison of historical (HIST) control rats (N = 78) with A SAL and B SAL rats (N = 12 per group). (A) %Freezing after shocks during Training. Fifteen minutes after the end of the training session, A SAL and B SAL rats received scopolamine, whereas historical control groups did not. (B) %Freezing (mean + SD) during the 8-minute test session, 24 hours after training. \*significantly different between historical controls and animals that received post-training scopolamine ( $p = .001$ ).**
